# Supplementary material for: Early Onset Preeclampsia Is Associated With Glycocalyx Degradation and Reduced Microvascular Perfusion
Source: PubMed Central journal article supplement — J Am Heart Assoc. 2019 Feb 15;8(4):e010647. doi: 10.1161/JAHA.118.010647 (PMC6405679; doi:10.1161/jaha.118.010647), 2019-02-15
Supplement: JAH3-8-e010647-s001.pdf [file JAH3-8-e010647-s001.pdf]

# **Supplemental Material**

**Table S1. Participant characteristics and pregnancy outcomes for reliability study.**

| <b>Variable</b>                 | <b>Repeatability<br/>study participants<br/>(n=15)</b> |
|---------------------------------|--------------------------------------------------------|
| Age (years)                     | 31.9 ± 3.5                                             |
| Race(% white)                   | 15 (100.0%)                                            |
| Gravida                         | 2 (1-3)                                                |
| Parity                          |                                                        |
| 0                               | 7 (46.7%)                                              |
| ≥1                              | 8 (53.3%)                                              |
| <b><i>Glycocheck test</i></b>   |                                                        |
| Gestational age (weeks)         | 33 (29-34)                                             |
| <b><i>Delivery</i></b>          |                                                        |
| Gestational age (weeks)         | 39 (35-40)                                             |
| Pregnancy outcome               |                                                        |
| Normotensive*                   | 10 (66.7%)                                             |
| Subsequent preeclampsia†        | 1 (6.7%)                                               |
| Preeclampsia                    | 1 (6.7%)                                               |
| Superimposed preeclampsia       | 1 (6.7%)                                               |
| Subsequent GH†                  | 2 (13.3%)                                              |
| Delivery type                   |                                                        |
| Vaginal                         | 11 (73.3%)                                             |
| C-section                       | 4 (26.7%)                                              |
| Systolic blood pressure (mmHg)  | 129±13                                                 |
| Diastolic blood pressure (mmHg) | 81±10                                                  |
| Fetal sex (% male)              | 10 (66.7%)                                             |
| Birthweight (g)                 | 3354 ± 1001                                            |
| Apgar (1 minute)                | 8 (8-9)                                                |
| Apgar (5 minutes)               | 9 (9-9)                                                |

Values are presented as mean ± SD, median (interquartile range) or n (%). 10 women had normotensive pregnancies, one

\* Two women had a history of preeclampsia, but were normotensive during the pregnancy examined.

† Patient developed the outcome after completing the reliability study  
g, grams; GH, gestational hypertension.

**Table S2. Trial-to-trial and day-to-day reliability for PBR among vessels in each size category.**

| Vessel size ( $\mu\text{m}$ )* | ICC for PBR           |                       |                             |
|--------------------------------|-----------------------|-----------------------|-----------------------------|
|                                | Day 1 (Trials 1 to 3) | Day 2 (Trials 1 to 3) | Day1 Average - Day2 Average |
| 3                              | poor                  | poor                  | poor                        |
| 4                              | poor                  | poor                  | poor                        |
| 5                              | poor                  | poor                  | poor                        |
| 6                              | poor                  | poor                  | poor                        |
| 7                              | poor                  | poor                  | poor                        |
| 8                              | poor                  | poor                  | poor                        |
| 9                              | poor                  | poor                  | moderate                    |
| 10                             | poor                  | poor                  | moderate                    |
| 11                             | poor                  | poor                  | moderate                    |
| 12                             | poor                  | poor                  | excellent                   |
| 13                             | poor                  | poor                  | good                        |
| 14                             | poor                  | poor                  | moderate                    |
| 15                             | poor                  | poor                  | moderate                    |
| 16                             | poor                  | poor                  | moderate                    |
| 17                             | poor                  | poor                  | moderate                    |
| 18                             | poor                  | poor                  | moderate                    |
| 19                             | poor                  | poor                  | poor                        |
| 20                             | poor                  | poor                  | poor                        |
| 21                             | poor                  | poor                  | poor                        |
| 22                             | poor                  | poor                  | poor                        |
| 23                             | poor                  | poor                  | poor                        |
| 24                             | poor                  | poor                  | poor                        |
| 25                             | poor                  | poor                  | poor                        |

ICC, intraclass correlation coefficient; PBR, perfused boundary region. \*Vessel size categories, in  $\mu\text{m}$ , are defined by the median width of the red blood cell column. Categories for ICCs: < 0.5 poor; 0.5 to 0.75 moderate, 0.75 to 0.9 good; >0.9 excellent. Day 1 and day 2 measurements were performed approximately 24 hours apart in 15 women in the 3<sup>rd</sup> trimester of pregnancy.

**Table S3. Day-to-day reliability for PBR composite measures.**

| Vessel size categories ( $\mu\text{m}$ )* | ICC (Day 1 Average – Day 2 Average) |          |
|-------------------------------------------|-------------------------------------|----------|
|                                           | ICC                                 | Category |
| 5-25                                      | 0.788                               | Good     |
| 5-9                                       | 0.527                               | Moderate |
| 10-19                                     | 0.868                               | Good     |
| 20-25                                     | 0.622                               | Moderate |
| 10-16                                     | 0.836                               | Good     |

ICC, intraclass correlation coefficient; PBR, perfused boundary region. \*Vessel size categories are defined by the median width of the RBC column ( $\mu\text{m}$ ). Within each category, values for each day were computed as the average of three trials. Each composite measure was then calculated as the average of the PBR values for all vessels in the included size categories. n=15 women in the 3<sup>rd</sup> trimester.

**Table S4. Test Conditions.**

| <b>Variable</b>               | <b>Normotensive<br/>(n = 73)</b> | <b>GDM<br/>(n = 21)</b> | <b>Late Onset<br/>PE<br/>(n = 29)</b> | <b>Early Onset<br/>PE<br/>(n = 14)</b> |
|-------------------------------|----------------------------------|-------------------------|---------------------------------------|----------------------------------------|
| Caffeine intake               | 23 (31.5%)                       | 4 (19.0%)               | 6 (20.7%)                             | 3 (21.4%)                              |
| Fasted for at least 4 hours   | 18 (24.7%)                       | 9 (42.9%)               | 8 (27.6%)                             | 1 (7.1%)                               |
| Misoprostol                   | 13 (17.8%)                       | 5 (23.8%)               | 16 (55.2%)                            | 0 (0%)                                 |
| Oxytocin                      | 10 (13.7%)                       | 4 (19.0%)               | 5 (17.2%)                             | 0 (0%)                                 |
| Active labor                  | 4 (5.6%)                         | 1 (5.0%)                | 4 (13.8%)                             | 0 (0%)                                 |
| Epidural                      | 3 (4.1%)                         | 1 (4.8%)                | 4 (13.8%)                             | 0 (0%)                                 |
| Anti-hypertensive medications | 0 (0%)                           | 1 (4.8%)                | 7 (24.1%)                             | 6 (42.9%)                              |
| Magnesium sulfate             | 0 (0%)                           | 0 (0%)                  | 9 (31%)                               | 5 (35.7%)                              |
| Betamethasone                 | 0 (0%)                           | 0 (0%)                  | 4 (13.8%)                             | 4 (28.6%)                              |
| Acetaminophen                 | 2 (2.7%)                         | 2 (9.5%)                | 11 (37.9%)                            | 8 (57.1%)                              |
| Thyroid medications           | 4 (5.5%)                         | 1 (4.8%)                | 1 (3.4%)                              | 1 (7.1%)                               |
| Glyburide                     | 0 (0%)                           | 8 (38.1%)               | 1 (3.4%)                              | 1 (7.1%)                               |

Data are presented as n (%). Caffeine intake was recorded as positive if women had consumed food, drinks or medications containing caffeine in the six hours prior to non-invasive glycocalyx measurements. Medications were recorded as positive if women had taken the medication within 24 hours of the non-invasive glycocalyx measurements. No statistical comparisons were performed.

**Table S5. Effect of GDM and PE on non-invasive glyocalyx measurements.**

| <b>Group</b>            | <b>PBR<br/>Mean<sup>†</sup> (95% CI)</b> | <b>Percentage of vessel<br/>segments filled with RBCs<br/>Mean<sup>†</sup> (95% CI)</b> |
|-------------------------|------------------------------------------|-----------------------------------------------------------------------------------------|
| Normotensive (n = 73)   | 1.989* (1.954-2.024)                     | 0.556* (0.546-0.566)                                                                    |
| GDM (n = 21)            | 1.974* (1.909-2.038)                     | 0.567* (0.547-0.586)                                                                    |
| Late onset PE (n = 29)  | 2.014* (1.959-2.069)                     | 0.563* (0.546-0.580)                                                                    |
| Early onset PE (n = 14) | 2.124 (2.045-2.203)                      | 0.529 (0.506-0.553)                                                                     |

Data were analyzed by repeated measures ANOVA (Between-subjects factor: group, Within-subjects factor: vessel size, Covariate: caffeine intake, Post-hoc test: least significant differences). Vessel size included 12 categories (5-16  $\mu\text{m}$ ), based on the median width of the RBC column. PBR:  $F = 3.600$ ,  $df = 3$ . Percentage of vessel segments filled with RBCs:  $F = 2.255$ ,  $df = 3$ .

CI, confidence interval; df, degrees of freedom; PBR, perfused boundary region; PE, preeclampsia; RBC, red blood cells.

\* $p < 0.05$  compared to women with early onset PE; <sup>†</sup>Adjusted for caffeine intake.

**Figure S1. Number of vessel segments for each size category among women in the reliability study.**

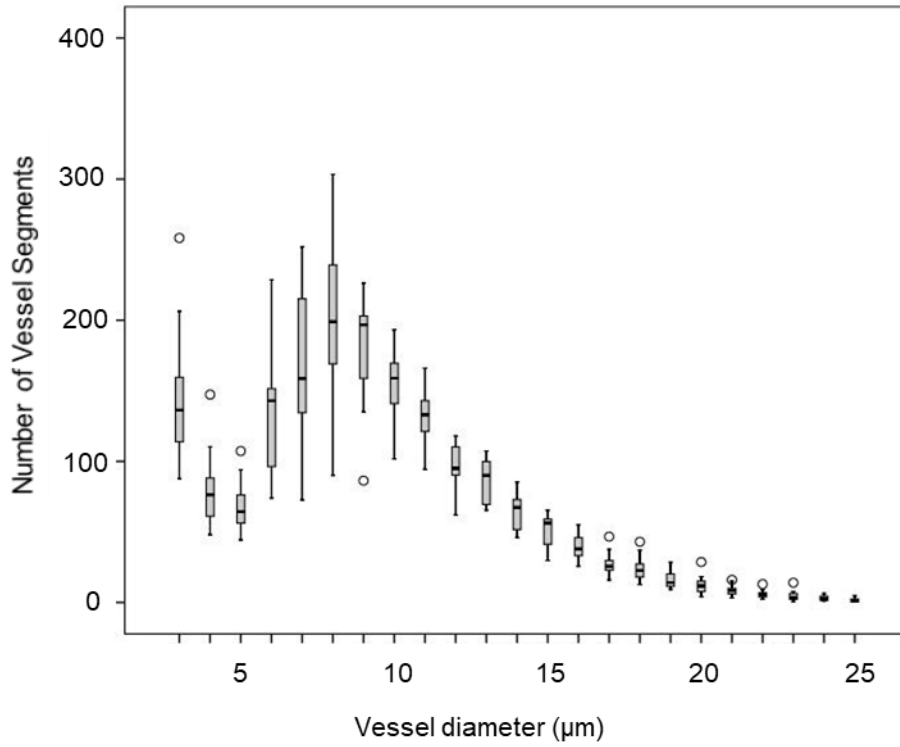

Average number of vessel segments for six trials (three trials per day), n = 15 women in the third trimester.
